# Supplementary material for: Clinical use of mass spectrometry (imaging) for hard tissue analysis in abnormal fracture healing
Source: publisher site journal article supplement (doi:10.1515/cclm-2019-0857), 2020-02-12
Supplement: Supplementary file 1 [file cclm-2019-0857_suppl.docx]

# Supplementary Material

**Supplemental Table 1:** Overview of studies performed with mass spectrometry (MS) techniques that have the potential to be used *in vivo* during operation. The samples used in the studies all are fresh and/or fresh frozen tissue. Only the on-tissue studies are listed and per study the most important *ex vivo* results are given. If *in vivo* experiments with the technique were performed, this information is provided as well. The results are predominately based on measurement of the molecules in the lipid mass range. For the different *in vivo* MS techniques, databases are built up based on which validation or prediction models are generated. For these models, the accuracy, sensitivity, and specificity of classification into the different groups are provided if reported.

| Author (year) | Sampling tool | Samples | *Ex vivo* results | *In vivo* experiments | Reference |
| --- | --- | --- | --- | --- | --- |
| Balog, *et al.* (2010) | Electrocautery  CO2-laser | Porcine organs, rat model, canine, and human samples. | - Tissue classification rates were higher than 97% for organ identification. - Mass spectra obtained with infrared laser ablation and electrocautery showed high similarity. | *In vivo* analysis of rat model showed that the mass spectra of various tissues were independent of nutritional fatty acid intake. | (1) |
| Schäfer, *et al.* (2011) | Cavitron ultrasonic surgical aspirator (CUSA) | Porcine organs, human brain samples (also with tumors), and liver cancer tissue. | - Mass spectra from gray and white matter showed characteristic differences. - Good separation was shown between healthy and cancer tissues as well as between different brain tumor types. - *Ex vivo* validation resulted in correct classification rate of 100% for glioblastoma multiform and healthy brain tissue, partly because of the small sample size | Not performed. | (2) |
| Schäfer, *et al.* (2011) | Ultraviolet and infrared lasers | Porcine organs, human colon carcinoma, and canine tissue. | - The reproducibility of the spectra obtained with the CO2-laser was higher than those obtained with the ultraviolet (Nd:YAG) laser, with correct classification rates of 82-95% and 55-70%, respectively. - The obtained spectra showed high similarity with spectra obtained with electrocautery. - Tissue identification of various tissues using the CO2-laser resulted in 96-99% accuracy. | *In vivo* analysis of canine tissue showed high similarity between *ex vivo* and *in vivo* data, with the main difference caused by the presence of blood. | (3) |
| Balog, *et al.* (2013) | Electrocautery | Human cancer and healthy tissue of different regions; stomach, colon, liver, lung, breast, brain, and others. | - Ex vivo analysis of solid tumors showed complete separation between different tumor types. - The origin of metastatic tumors could be identified *ex vivo* as well as *in vivo*. | Electrocautery was used during 81 resections, resulting in an accuracy of 96.2% with a sensitivity of 97.7% and specificity of 96.5% for different cancer types. | (4) |
| Balog, *et al.* (2015) | Electrocautery via an endoscopic polypectomy snare | Human colonic adenocarcinoma, healthy colonic mucosa, and adenomatous polyps. | - Differentiation was possible between healthy intestinal wall tissue, colorectal cancer, and adenomatous polyps. | The method was tested in three patients and was used for diagnosis. | (5) |
| Fatou, *et al.* (2016) | SpiderMass | Bovine liver, human normal and cancer ovarian tissue, and human skin. | - Different mass spectra were obtained from healthy and normal ovarian tissue. | *In vivo* analysis was done on human skin and showed different lipid profiles between men and women and for treatment with hand cream. | (6) |
| Alexander, *et al.* (2017) | Electrocautery | Human colorectal cancer and colonic adenomas. | - Cross-validation of the classification model for cancer vs. adenomas resulted in an overall accuracy of 94.4% with a sensitivity of 78.6% and specificity of 97.3% for the adenomas. - Classification based on tumor histological subtype, tumor stage, and lymphatic involvement resulted in overall accuracies of 90.0%, 74.7%, and 83.5%, respectively. | Electrocautery was used in 5 patients and showed that the lipids identified with *ex vivo* analysis could be captured in near real-time. | (7) |
| St John, *et al.* (2017) | Electrocautery | Human breast cancer and healthy tissue. | - Cross-validation of *ex vivo* classification model resulted in an overall accuracy of 94.4% with a sensitivity of 93.4% and specificity of 94.9%. - *Ex vivo* validation of the classification model resulted in an overall model accuracy of 95.8% with a sensitivity of 90.9% and specificity of 98.8%. | Electrocautery was used in 6 case studies, resulting in interpretation of 99.27% of the obtained spectra during surgery. | (8) |
| Woolman, *et al.* (2017) | Picosecond InfraRed Laser (PIRL) | Mouse human breast cancer model and other mouse tissue. | - High reproducibility of the mass spectra between animals. - Good separation of different tissue types. - The presence of different necrosis and cancer markers in metastatic breast tumors was shown. | Not performed. | (9) |
| Woolman, *et al.* (2017) | PIRL | Murine xenografts of two medulloblastoma subtypes. | - The medulloblastoma subgroups showed significantly different mass spectra. - A subgroup determination success rate of 98% was achieved. - Cross-validation of the classification model resulted in a correct prediction rate of 94%, with no misclassification. | Not performed. | (10) |
| Zhang, *et al.* (2017) | MasSpec Pen | Human normal and cancer (breast, lung, thyroid, and ovary) tissues, and mouse normal and cancer tissue. | - *Ex vivo* analysis resulted in an overall accuracy of 96.3% with a sensitivity of 96.4% and specificity of 96.2% for the four cancer types. - Different subtypes of lung and thyroid cancer could be separated with accuracies of 93.8%, 92.2%, 94.7%, and 97.8% for squamous cell carcinoma (lung), adenocarcinoma (lung), follicular thyroid adenoma, and papillary thyroid carcinoma, respectively. | *In vivo* analysis was performed on a mouse model and showed no macroscopic or microscopic observable tissue harm. Cancer tissue showed a distinctive profile from the normal soft tissue. | (11) |
| Phelps, *et al.* (2018) | Electrocautery | Human normal, ovarian cancer, and borderline ovarian tumor. | - Cross-validation of a classification model for normal vs. ovarian cancer resulted in an accuracy of 97.6% with a sensitivity of 97.4% and specificity of 100%. - Cross-validation of a classification model for ovarian cancer vs. borderline ovarian tumors resulted in accuracies ranging from 90.0 to 93.5% with a sensitivity of 90.5% and specificity of 89.7%. - Validation with fresh tissue resulted in an overall accuracy of 99.1%. | Electrocautery was used on 45 tissue samples of 6 patients and provided high-quality mass spectra. | (12) |
| Saudemont, *et al.* (2018) | SpiderMass | Canine soft tissue sarcomas, and normal tissue. | - Cross-validation of the classification model for normal and cancer resulted in a correct classification rate of 99.94% for positive mode and 97.63% for negative mode. - Cross-validation of the classification model for normal, cancer, and necrosis resulted in a correct classification rate of 99.06% for positive mode. - *Ex vivo* validation did not show classification failures and class similarity values above 91%. - Different tumor grades and subtypes could be differentiated. | The instrument was used *in vivo* on dog patients to confirm the low invasiveness. | (13) |
| Genangeli, *et al.* (2019) | Electrocautery  CO2-laser | Bone, bone marrow, cartilage, fat, liver, muscle, skin of different animals | - Compared to electrocautery, the CO2-laser resulted in less tissue damage, higher reproducibility, and improved quality in mass spectra. - Tissue classification models based on mass peaks that are tissue-specific and common between electrocautery and CO2-laser improved the correct classification rate. - The CO2-laser was used on hard tissues (bone, bone marrow, cartilage) resulting in lipid-rich signals. | Not performed | (14) |
| Sans, *et al.* (2019) | MasSpec Pen | Human ovarian, fallopian tube, and peritoneum tissue sample, including cancerous tissue. | - The classification model for serous carcinomas (high- and low-grade) and normal tissue showed an accuracy of 92.3% with a sensitivity of 91.7% and specificity of 92.9%. - The classification model for high-grade serous carcinomas, low-grade serous carcinomas, and normal tissue showed an overall accuracy of 97.7%. - Ovarian cancer could be distinguished from healthy fallopian tube and peritoneum. - The obtained mass spectra where highly comparable between mass spectrometers with different resolving powers. | Not performed | (15) |
| Woolman, *et al.* (2019) | PIRL | Human medulloblastoma of four different subgroups. | - The medulloblastoma subgroups could clearly be separated. - Cross-validation of the classification model resulted in a misclassification rate of 4.2% and 5.8% of the data was unclassifiable. - *Ex vivo* validation resulted in a correct classification rate of 98.9%, in which failed classifications were explained by high amounts of stroma and sample damage. | Not performed. | (16) |

# References

1. Balog J, Szaniszlo T, Schaefer KC, Denes J, Lopata A, Godorhazy L, et al. Identification of biological tissues by rapid evaporative ionization mass spectrometry. Anal Chem. 2010;82(17):7343-50.

2. Schafer KC, Balog J, Szaniszlo T, Szalay D, Mezey G, Denes J, et al. Real time analysis of brain tissue by direct combination of ultrasonic surgical aspiration and sonic spray mass spectrometry. Anal Chem. 2011;83(20):7729-35.

3. Schafer KC, Szaniszlo T, Gunther S, Balog J, Denes J, Keseru M, et al. In situ, real-time identification of biological tissues by ultraviolet and infrared laser desorption ionization mass spectrometry. Anal Chem. 2011;83(5):1632-40.

4. Balog J, Sasi-Szabo L, Kinross J, Lewis MR, Muirhead LJ, Veselkov K, et al. Intraoperative tissue identification using rapid evaporative ionization mass spectrometry. Sci Transl Med. 2013;5(194):194ra93.

5. Balog J, Kumar S, Alexander J, Golf O, Huang J, Wiggins T, et al. In vivo endoscopic tissue identification by rapid evaporative ionization mass spectrometry (REIMS). Angew Chem Int Ed Engl. 2015;54(38):11059-62.

6. Fatou B, Saudemont P, Leblanc E, Vinatier D, Mesdag V, Wisztorski M, et al. In vivo Real-Time Mass Spectrometry for Guided Surgery Application. Sci Rep. 2016;6:25919.

7. Alexander J, Gildea L, Balog J, Speller A, McKenzie J, Muirhead L, et al. A novel methodology for in vivo endoscopic phenotyping of colorectal cancer based on real-time analysis of the mucosal lipidome: a prospective observational study of the iKnife. Surg Endosc. 2017;31(3):1361-70.

8. St John ER, Balog J, McKenzie JS, Rossi M, Covington A, Muirhead L, et al. Rapid evaporative ionisation mass spectrometry of electrosurgical vapours for the identification of breast pathology: towards an intelligent knife for breast cancer surgery. Breast Cancer Res. 2017;19(1):59.

9. Woolman M, Gribble A, Bluemke E, Zou J, Ventura M, Bernards N, et al. Optimized Mass Spectrometry Analysis Workflow with Polarimetric Guidance for ex vivo and in situ Sampling of Biological Tissues. Sci Rep. 2017;7(1):468.

10. Woolman M, Ferry I, Kuzan-Fischer CM, Wu M, Zou J, Kiyota T, et al. Rapid determination of medulloblastoma subgroup affiliation with mass spectrometry using a handheld picosecond infrared laser desorption probe. Chem Sci. 2017;8(9):6508-19.

11. Zhang J, Rector J, Lin JQ, Young JH, Sans M, Katta N, et al. Nondestructive tissue analysis for ex vivo and in vivo cancer diagnosis using a handheld mass spectrometry system. Sci Transl Med. 2017;9(406):eaan3968.

12. Phelps DL, Balog J, Gildea LF, Bodai Z, Savage A, El-Bahrawy MA, et al. The surgical intelligent knife distinguishes normal, borderline and malignant gynaecological tissues using rapid evaporative ionisation mass spectrometry (REIMS). Br J Cancer. 2018;118(10):1349-58.

13. Saudemont P, Quanico J, Robin YM, Baud A, Balog J, Fatou B, et al. Real-Time Molecular Diagnosis of Tumors Using Water-Assisted Laser Desorption/Ionization Mass Spectrometry Technology. Cancer Cell. 2018;34(5):840-51.e4.

14. Genangeli M, Heeren RMA, Porta Siegel T. Tissue classification by rapid evaporative ionization mass spectrometry (REIMS): comparison between a diathermic knife and CO2 laser sampling on classification performance. Anal Bioanal Chem. 2019.

15. Sans M, Zhang J, Lin JQ, Feider CL, Giese N, Breen MT, et al. Performance of the MasSpec Pen for Rapid Diagnosis of Ovarian Cancer. Clin Chem. 2019;65(5):674-83.

16. Woolman M, Kuzan-Fischer CM, Ferry I, Kiyota T, Luu B, Wu M, et al. Picosecond Infrared Laser Desorption Mass Spectrometry Identifies Medulloblastoma Subgroups on Intrasurgical Timescales. Cancer Res. 2019;79(9):2426-34.
